# Supplementary material for: One-step synthesis of PdCu@Ti3C2 with high catalytic activity in the Suzuki–Miyaura coupling reaction
Source: Royal Society of Chemistry journal article supplement (doi:10.1039/d2na00327a), 2022-01-01

Supporting information for

## Preparation and Characterization of PdCu@Ti<sub>3</sub>C<sub>2</sub> Catalyst for Suzuki-Miyaura Coupling Reaction

**Table S1.** The content of Pd and Cu elements in the PdCu@Ti<sub>3</sub>C<sub>2</sub>, Pd<sup>1</sup>@Ti<sub>3</sub>C<sub>2</sub>,

Pd<sup>2</sup>@Ti<sub>3</sub>C<sub>2</sub>

| Sample                                          | Element | Mass fraction (%) |
|-------------------------------------------------|---------|-------------------|
| PdCu@Ti <sub>3</sub> C <sub>2</sub>             | Cu      | 9.16%             |
|                                                 | Pd      | 3.59%             |
| Pd <sup>1</sup> @Ti <sub>3</sub> C <sub>2</sub> | Pd      | 1.40%             |
| Pd <sup>2</sup> @Ti <sub>3</sub> C <sub>2</sub> | Pd      | 1.02%             |
| Cu@Ti <sub>3</sub> C <sub>2</sub>               | Cu      | 11.43%            |

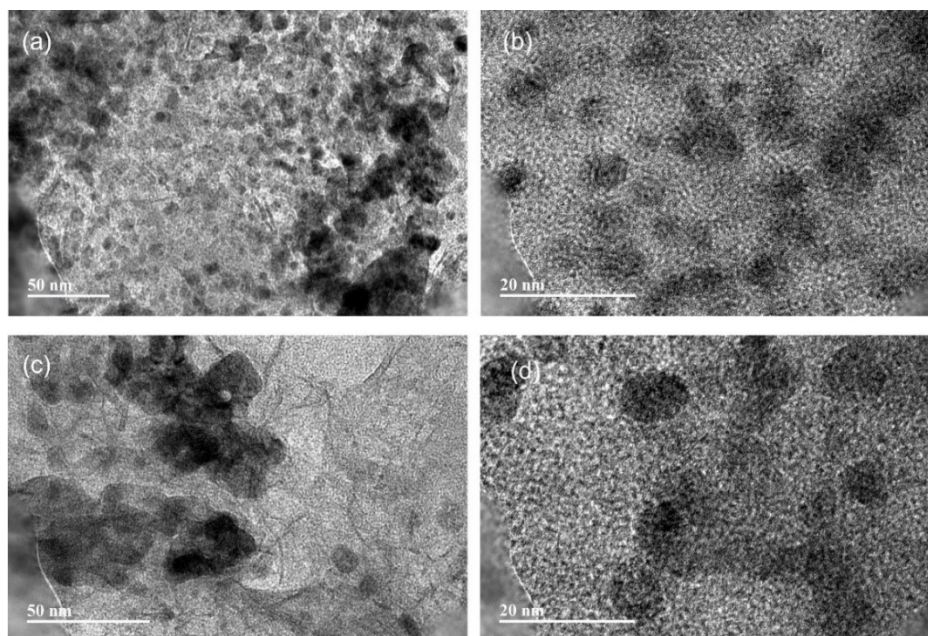

**Figure S1.** (a) Low magnification TEM image of PdCu@Ti<sub>3</sub>C<sub>2</sub> after first cycle (b) HRTEM image of PdCu nanoparticles after first cycle. (c) Low magnification TEM image of PdCu@Ti<sub>3</sub>C<sub>2</sub> after tenth cycle (d) HRTEM image of PdCu nanoparticles

after fifth cycle.

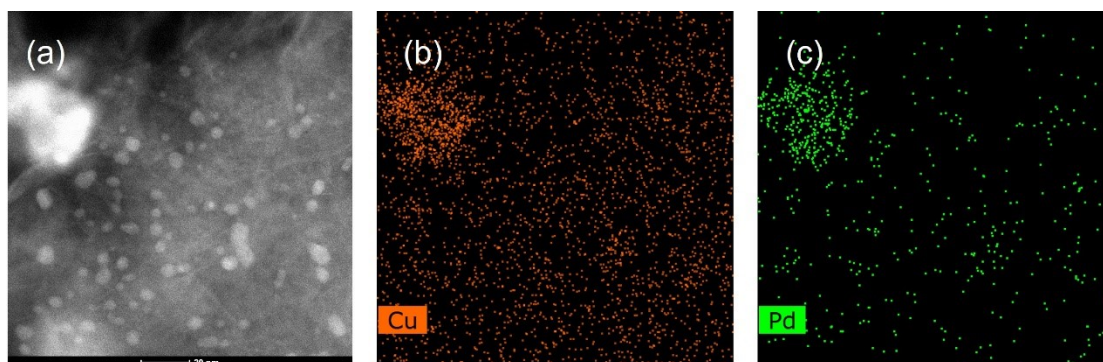

**Figure S2.** (a)STEM image of PdCu@Ti<sub>3</sub>C<sub>2</sub> after tenth cycle. (b-f) EDS mapping of PdCu@Ti<sub>3</sub>C<sub>2</sub> after cycle.

### **<sup>1</sup>H and <sup>13</sup>C NMR spectra of the product**

#### **4-Methoxybiphenyl 3a:**

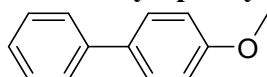

<sup>1</sup>H NMR (500 MHz, CDCl<sub>3</sub>) δ 7.54 (d, *J* = 7.5 Hz, 2H), 7.52 (d, *J* = 8.8 Hz, 2H), 7.40 (t, *J* = 7.7 Hz, 2H), 7.29 (t, *J* = 7.4 Hz, 1H), 6.97 (d, *J* = 8.7 Hz, 2H), 3.83 (s, 3H).

#### **Aminebiphenyl 3b:**

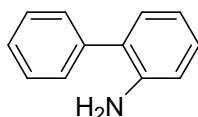

<sup>1</sup>H NMR (600 MHz, CDCl<sub>3</sub>) δ 7.43 (d, *J* = 8.2 Hz, 4H), 7.33 (t, *J* = 6.8 Hz, 1H), 7.15 – 7.11 (m, 2H), 6.82 (t, *J* = 7.4 Hz, 1H), 6.75 (d, *J* = 8.0 Hz, 1H), 3.63 (s, 2H).

#### **Biphenyl 3c:**

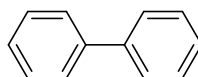

<sup>1</sup>H NMR (500 MHz, CDCl<sub>3</sub>) δ 7.56 (d, *J* = 7.1 Hz, 4H), 7.40 (t, *J* = 7.7 Hz, 4H), 7.31 (t, *J* = 7.4 Hz, 2H).

#### **4-Nitrobiphenyl 3d:**

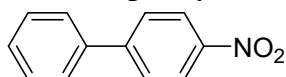

<sup>1</sup>H NMR (500 MHz, CDCl<sub>3</sub>) δ 8.30 (d, *J* = 8.9 Hz, 2H), 7.74 (d, *J* = 8.9 Hz, 2H), 7.62 (d, *J* = 7.1 Hz, 2H), 7.50 (t, *J* = 7.4 Hz, 2H), 7.44 (t, *J* = 7.3 Hz, 1H).

#### **1-Methoxy-4-(4-methylphenyl)benzene 3e:**

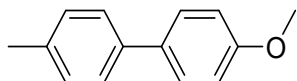

$^1\text{H NMR}$  (500 MHz,  $\text{CDCl}_3$ )  $\delta$  7.52 (d,  $J = 8.8$  Hz, 2H), 7.46 (d,  $J = 8.1$  Hz, 2H), 7.24 (d,  $J = 7.9$  Hz, 2H), 6.97 (d,  $J = 8.8$  Hz, 2H), 3.85 (s, 3H), 2.39 (s, 3H).

**1-Fluoro-4-(4-methylphenyl)benzene 3f:**

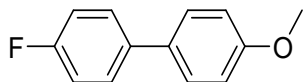

$^1\text{H NMR}$  (500 MHz,  $\text{CDCl}_3$ )  $\delta$  7.52 – 7.46 (m, 4H), 7.14 – 7.08 (m, 2H), 7.00 – 6.96 (m, 2H), 3.86 (s, 3H).

**4-Methylbiphenyl 3g:**

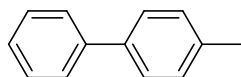

$^1\text{H NMR}$  (500 MHz,  $\text{CDCl}_3$ )  $\delta$  7.57 (d,  $J = 8.5$  Hz, 2H), 7.48 (d,  $J = 8.1$  Hz, 2H), 7.41 (d,  $J = 7.9$  Hz, 2H), 7.32 (d,  $J = 4.8$  Hz, 1H), 7.22 (d,  $J = 7.9$  Hz, 2H), 2.37 (s, 3H).

**4-Phenylbenzaldehyde 3h:**

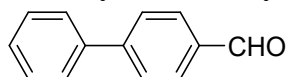

$^1\text{H NMR}$  (600 MHz,  $\text{CDCl}_3$ )  $\delta$  10.06 (s, 1H), 7.95 (d,  $J = 8.0$  Hz, 2H), 7.75 (d,  $J = 7.9$  Hz, 2H), 7.64 (d,  $J = 7.4$  Hz, 2H), 7.48 (t,  $J = 7.5$  Hz, 2H), 7.42 (t,  $J = 7.3$  Hz, 1H).

**Biphenyl-4-amine 3i:**

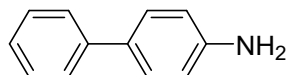

$^1\text{H NMR}$  (600 MHz,  $\text{CDCl}_3$ )  $\delta$  7.53 (d,  $J = 7.1$  Hz, 2H), 7.42 – 7.37 (m, 4H), 7.26 (d,  $J = 6.9$  Hz, 1H), 6.73 (d,  $J = 7.6$  Hz, 2H), 3.69 (s, 2H).

**2-Phenylpyridine 3j:**

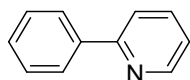

$^1\text{H NMR}$  (600 MHz,  $\text{CDCl}_3$ )  $\delta$  8.69 (d,  $J = 4.6$  Hz, 1H), 7.99 (d,  $J = 7.7$  Hz, 2H), 7.72 (d,  $J = 6.9$  Hz, 2H), 7.47 (t,  $J = 7.5$  Hz, 2H), 7.41 (t,  $J = 7.3$  Hz, 1H), 7.21 (t,  $J = 5.6$  Hz, 1H).

**3-Phenylquinoline 3k:**

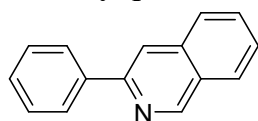

$^1\text{H NMR}$  (600 MHz,  $\text{CDCl}_3$ )  $\delta$  9.17 (s, 1H), 8.25 (s, 1H), 8.14 (d,  $J = 8.4$  Hz, 1H), 7.83 (d,  $J = 8.1$  Hz, 1H), 7.70 – 7.66 (m, 3H), 7.54 (t,  $J = 7.5$  Hz, 1H), 7.49 (t,  $J = 7.5$  Hz,

2H), 7.41 (t,  $J = 7.4$  Hz, 1H).

### Key Intermediates for the Synthesis of Abemaciclib

$^1\text{H}$  NMR (500 MHz,  $\text{DMSO-}d_6$ )  $\delta$  8.97 (d,  $J = 3.4$  Hz, 1H), 8.16 (s, 1H), 7.63 (d,  $J = 11.8$  Hz, 1H), 4.89 – 4.84 (m, 1H), 2.65 (s, 3H), 1.60 (d,  $J = 6.9$  Hz, 6H).

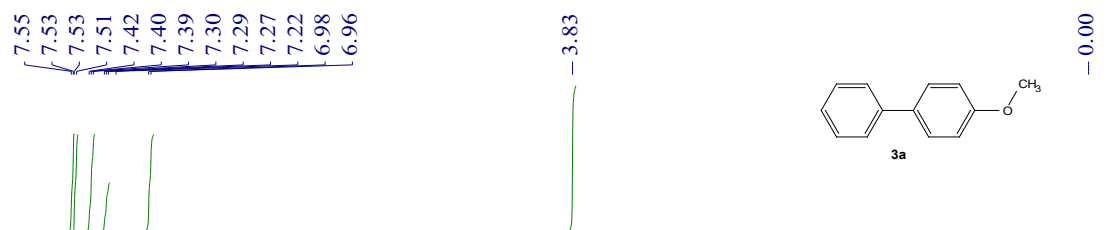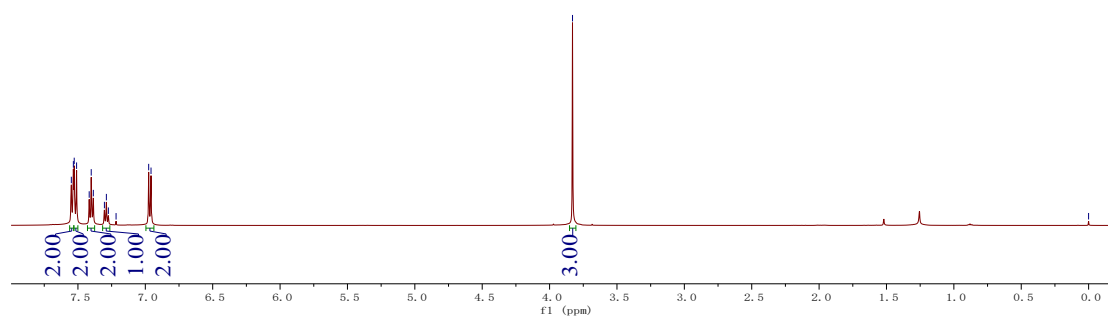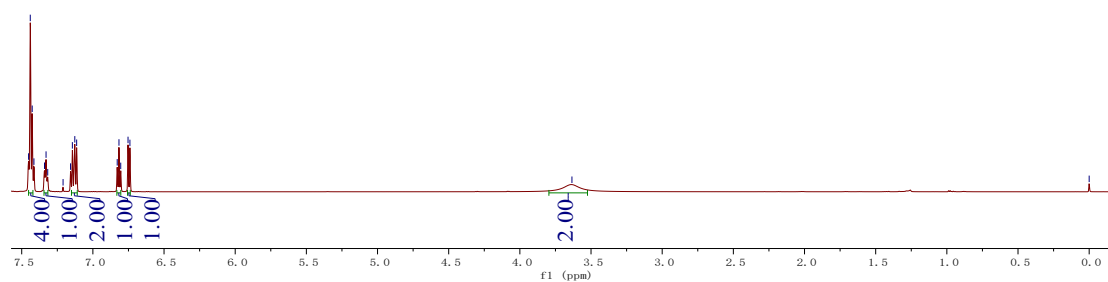

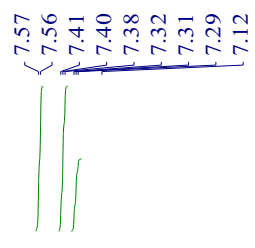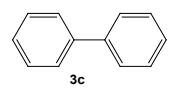

- 0.00

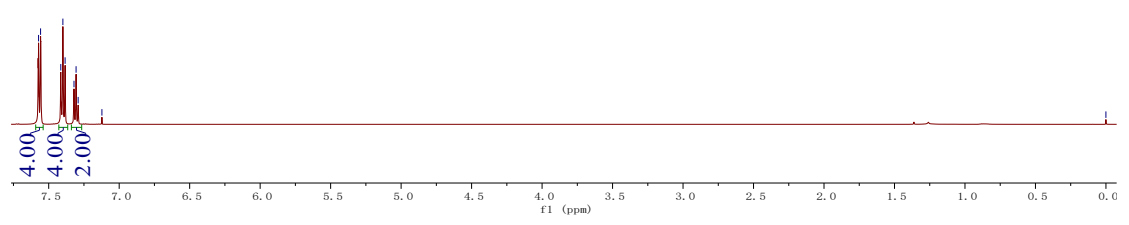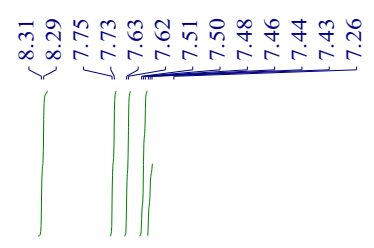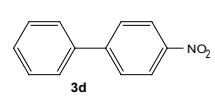

- 0.00

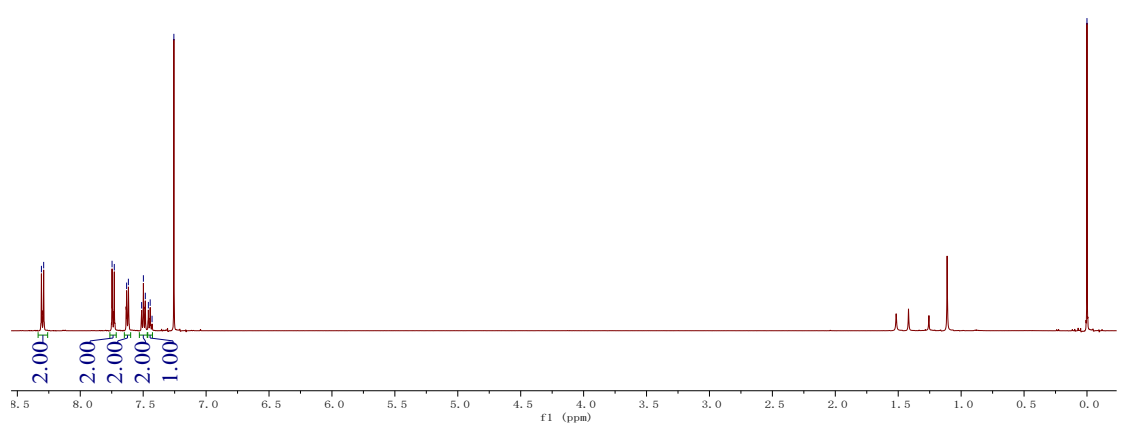

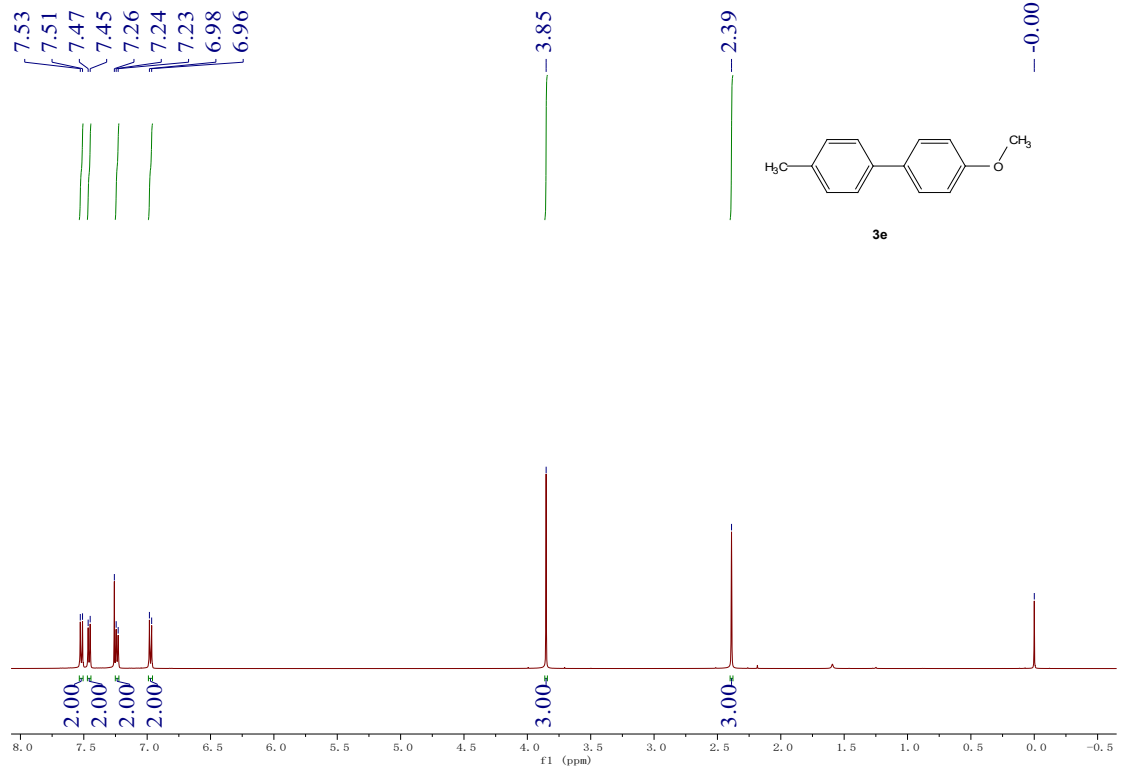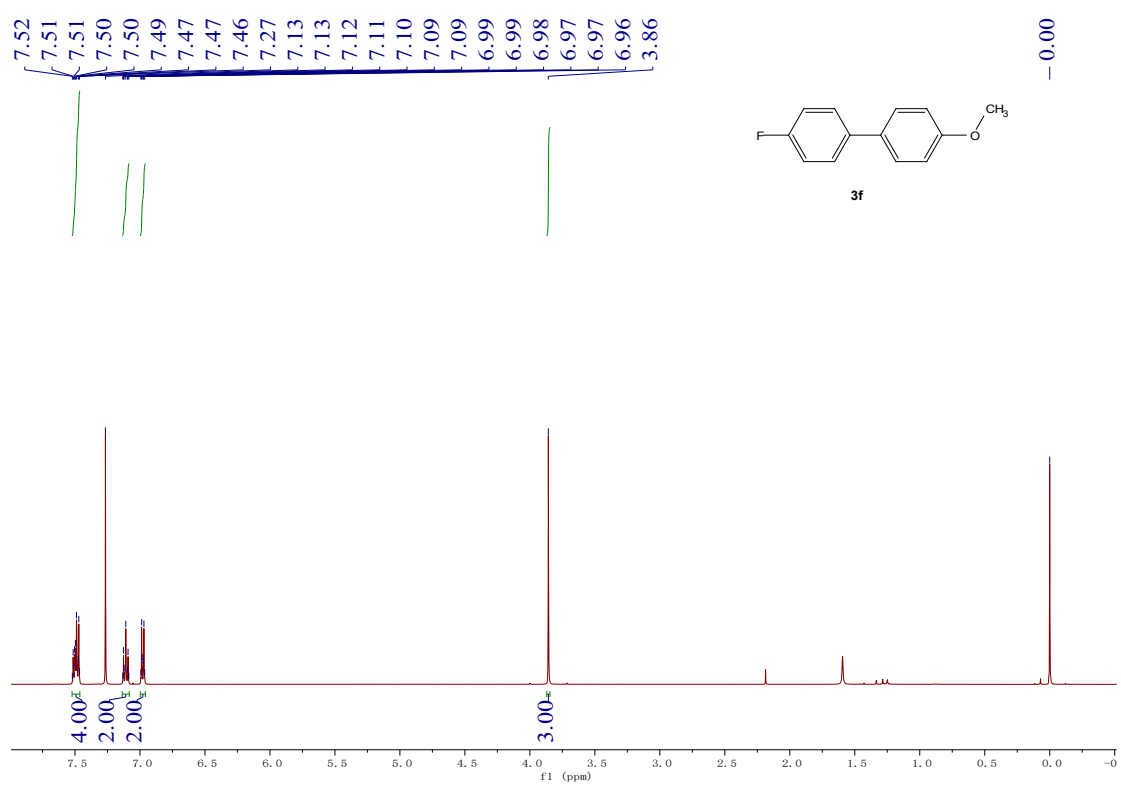

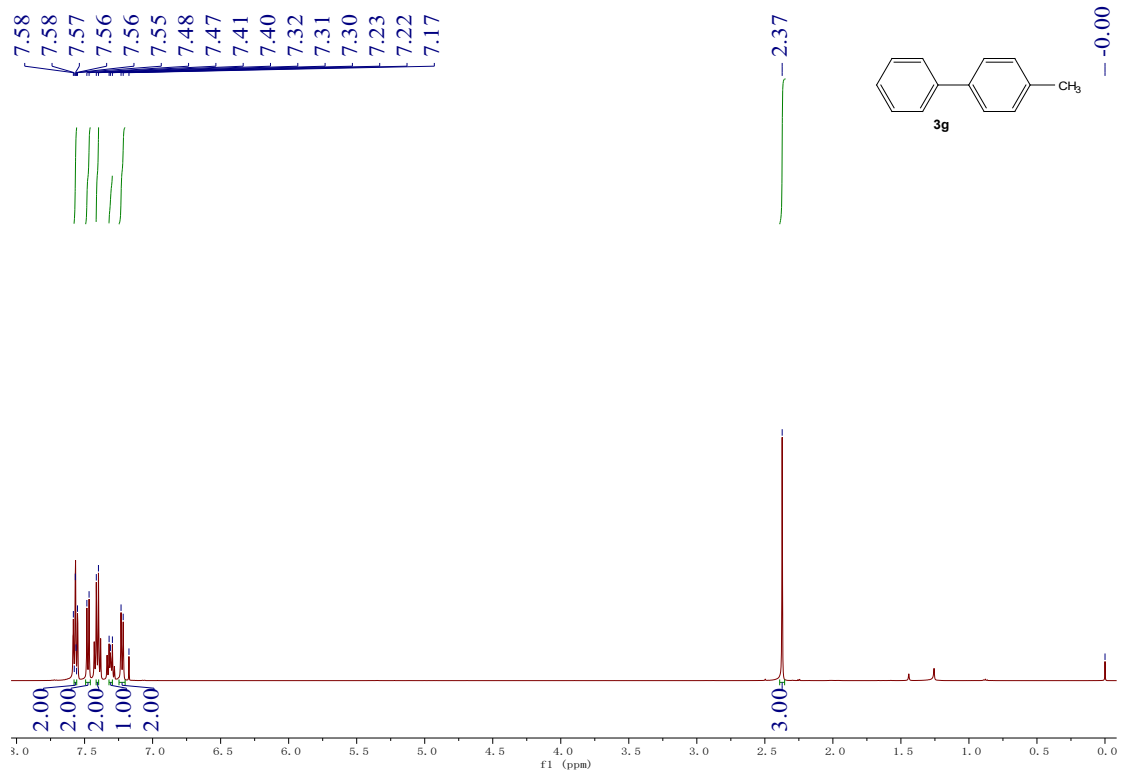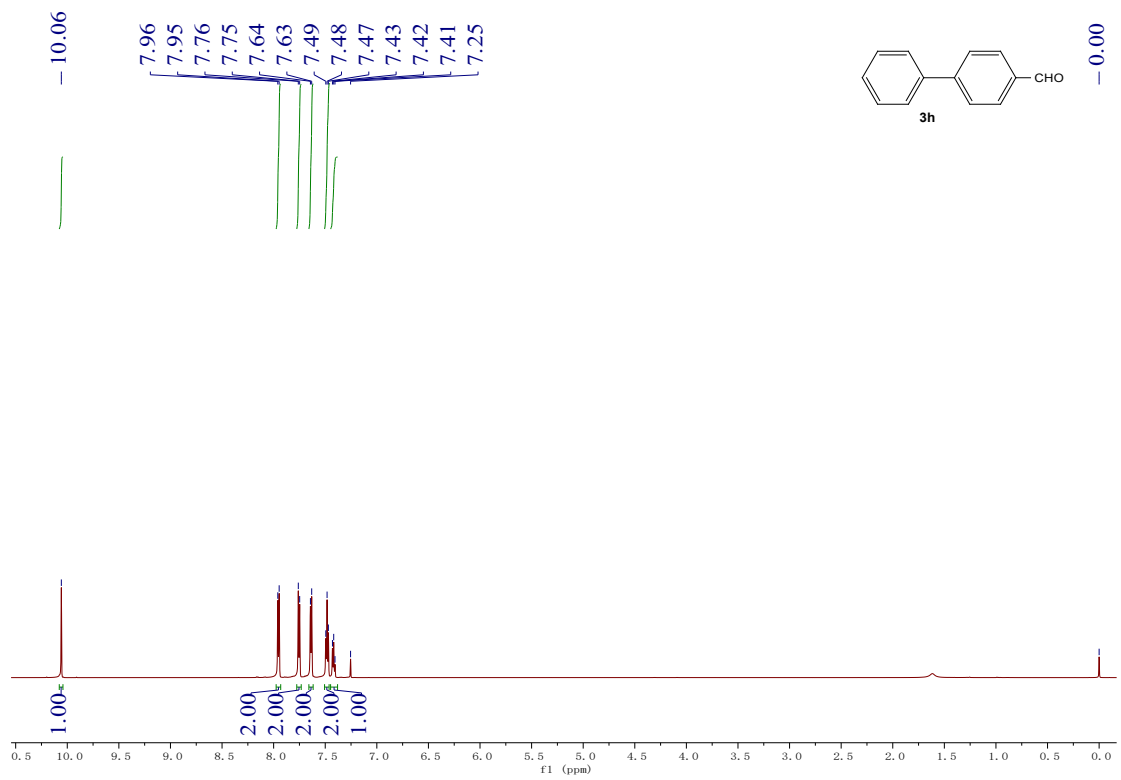

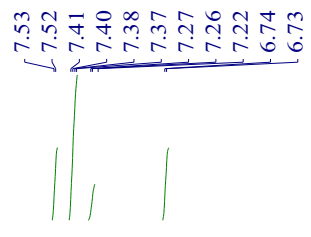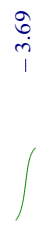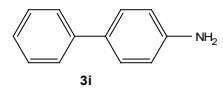

-0.00

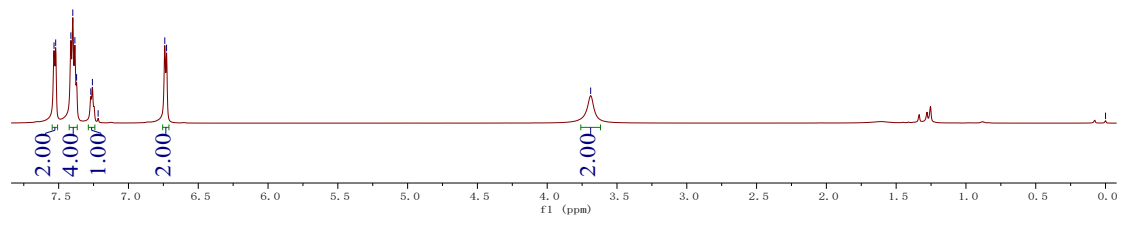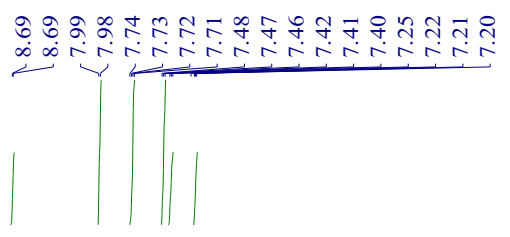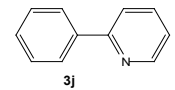

-0.00

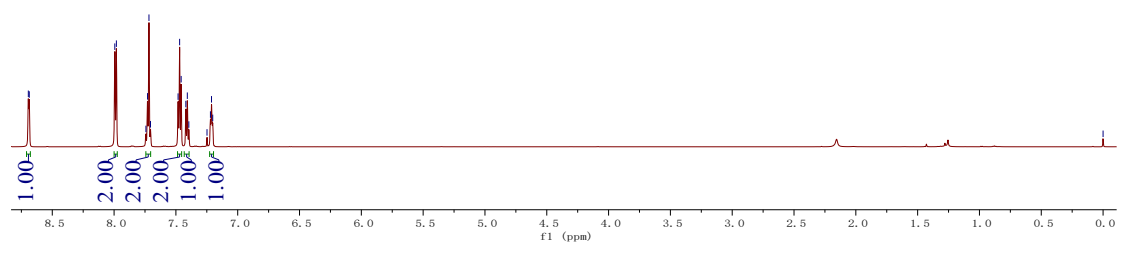



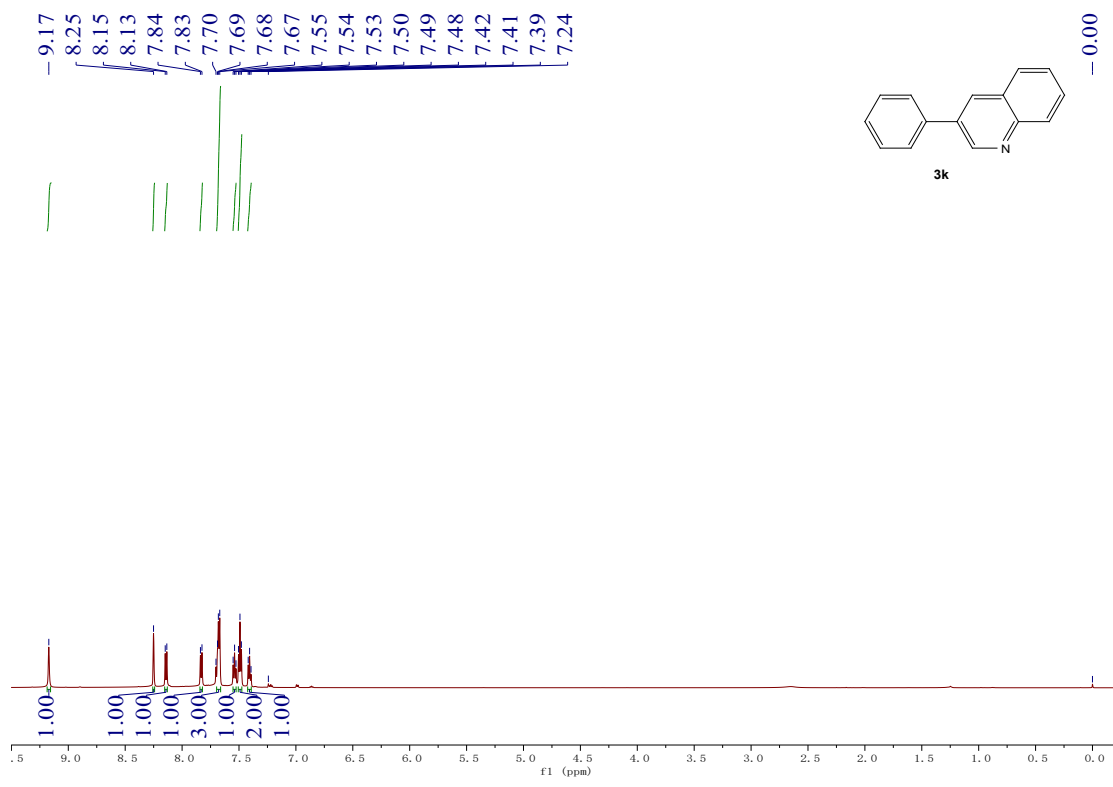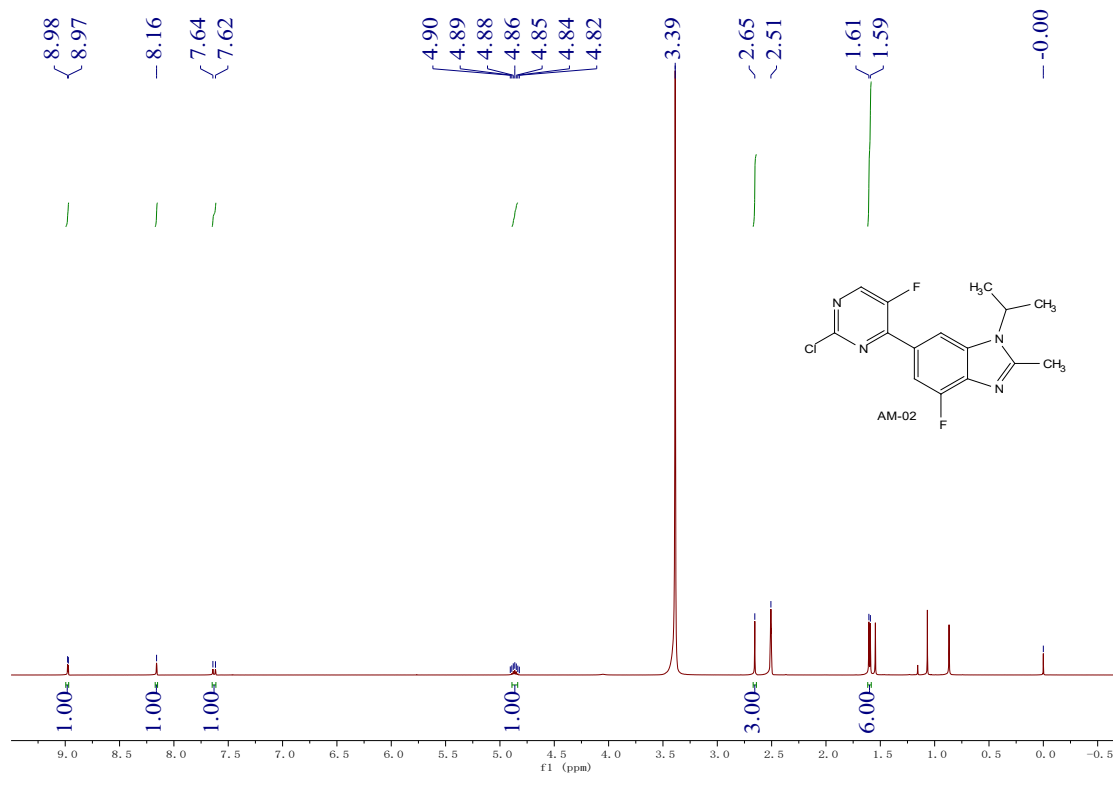

Supplement: d2na00327a1.pdf [file d2na00327a1.pdf]
